# Supplementary material for: Molecular and clinical determinants of response and resistance to rucaparib for recurrent ovarian cancer treatment in ARIEL2 (Parts 1 and 2)
Source: PubMed Central journal article supplement (PMC8093258; doi:10.1038/s41467-021-22582-6), 2021-05-03
Supplement: 41467_2021_22582_MOESM1_ESM.pdf [file 41467_2021_22582_MOESM1_ESM.pdf]

## Supplementary Information

### Ethics approval

The study was approved by by the following institutional review boards and ethics committees for participating centers: Alberta Cancer Research Ethics Committee (ACREC), BC Cancer Agency - Vancouver Cancer Centre, CEIm Hospital Clínico Universitario de Valencia, Comité d'Éthique de la recherche du CHUM, Dana-Faber Cancer Institute Office For Human Research Studies, Fox Chase Cancer Center IRB, France CPP No., Fred Hutchinson Cancer Research Center Institutional Review Office, Health Research Ethics Board of Alberta Cancer Committee, Jewish General Hospital Research Ethics committee, Johns Hopkins Institutional Review Board, Massachusetts General Hospital Partners Human Research Committee, Mayo Clinic IRB, Melbourne Health HREC, Melbourne Health Office For Research, Memorial Sloan Kettering Cancer Center IRB/Privacy Board, Mercy Health HREC, Mission Health System IRB, Northern Sydney Local Health District Research Governance Office, NYU School of Medicine Institutional Review Board, Ontario Cancer Research Ethics Board, Orlando Regional Medical Center IRB, Quorum Review IRB (Now Advarra), Royal Brisbane and Women's Hospital Service District, Human Research Ethics Committee, Sir Charles Gairdner and Osborne Park Health Care Group, Human Research Ethics Committee, South Eastern Sydney Local Health District, Southern Adelaide Clinical Human Research Ethics Committee, Stanford University Institutional Review Board, The University of Texas MD Anderson Cancer Center IRB, Texas Oncology Austin Brain Tumor Center, UBC BC Cancer Agency Research Ethics Board, UCLA Office of Human Research Protection Program, UC San Diego Human Research Protections Program, University of California San Francisco Human Research Protection Program, University of Miami Human Subject Research Office, University of Oklahoma Health Sciences Center IRB, University of Pennsylvania IRB, Washington University in St. Louis Human Research Protection Office, West of Scotland Research Ethics Service, Western Institutional Review Boards, Western Sydney Local Health District Research Governance Office.

**Supplementary Table S1 | Additional baseline demographics and disease characteristics**

|                                                                                            | <b>ARIEL2<br/>Part 1<br/>(n=204)</b> | <b>ARIEL2<br/>Part 2<br/>(n=287)</b> |
|--------------------------------------------------------------------------------------------|--------------------------------------|--------------------------------------|
| Optimally debulked, n (%)                                                                  |                                      |                                      |
| Yes                                                                                        | 156 (76.5%)                          | 227 (79.1%)                          |
| No                                                                                         | 36 (17.6%)                           | 40 (13.9%)                           |
| Not known                                                                                  | 12 (5.9%)                            | 20 (7.0%)                            |
| Most common platinum-resistant agents <sup>a</sup> , n (%)                                 |                                      |                                      |
| Liposomal doxorubicin monotherapy                                                          | 0                                    | 72 (34.0)                            |
| Bevacizumab + chemotherapy (paclitaxel, PLD or topotecan)                                  | 0                                    | 29 (13.7)                            |
| Paclitaxel monotherapy                                                                     | 0                                    | 25 (11.8)                            |
| Gemcitabine monotherapy                                                                    | 0                                    | 19 (9.0)                             |
| Topotecan monotherapy                                                                      | 0                                    | 12 (5.7)                             |
| Liposomal doxorubicin + trabectedin                                                        | 0                                    | 8 (3.8)                              |
| Other                                                                                      | 0                                    | 47 (22.2)                            |
| <sup>a</sup> Categories are not mutually exclusive<br>PLD, pegylated liposomal doxorubicin |                                      |                                      |

**Supplementary Table S2 | Primary and secondary endpoint by prespecified HRD subgroup in ARIEL2 Part 2**

|                                                                                                                                                                                                                                                                                                                                                                                                                                       | <b>Primary endpoint confirmed objective response by RECIST, n/N (%) [95% CI]</b> | <b>Secondary endpoint of confirmed objective response rate by combined RECIST and CA-125 response, n/N (%) [95% CI]</b> |
|---------------------------------------------------------------------------------------------------------------------------------------------------------------------------------------------------------------------------------------------------------------------------------------------------------------------------------------------------------------------------------------------------------------------------------------|----------------------------------------------------------------------------------|-------------------------------------------------------------------------------------------------------------------------|
| <i>BRCA</i> mutant                                                                                                                                                                                                                                                                                                                                                                                                                    | 26/84 (31.0)<br>[21.3–42.0]                                                      | 46/84 (54.8)<br>[43.5–65.7]                                                                                             |
| <i>BRCA</i> wild type and LOH high <sup>a</sup>                                                                                                                                                                                                                                                                                                                                                                                       | 5/73 (6.8)<br>[2.3–15.3]                                                         | 9/73 (12.3)<br>[5.8–22.1]                                                                                               |
| <i>BRCA</i> wild type and LOH low                                                                                                                                                                                                                                                                                                                                                                                                     | 6/107 (5.6)<br>[2.1–11.8]                                                        | 14/107 (13.1)<br>[7.3–21.0]                                                                                             |
| <i>BRCA</i> wild type and LOH unclassified <sup>b</sup>                                                                                                                                                                                                                                                                                                                                                                               | 3/23 (13.0)<br>[2.8–33.6]                                                        | 7/23 (30.4)<br>[13.2–52.9]                                                                                              |
| <sup>a</sup> For LOH high, a cutoff of ≥18% genomic LOH was used. <sup>b</sup> Tumor sample was not evaluable for percentage of genomic LOH due to low tumor content or low aneuploidy.<br><i>BRCA</i> , <i>BRCA1</i> or <i>BRCA2</i> ; CA-125, cancer antigen 125; CI, confidence interval; HRD, homologous recombination deficiency; LOH, loss of heterozygosity; RECIST, Response Evaluation Criteria in Solid Tumors version 1.1. |                                                                                  |                                                                                                                         |

**Supplementary Table S3 | Summary of safety in ARIEL2 Part 2**

|                                                                 | <b>ARIEL2 Part 2<br/>(N=287)</b> |
|-----------------------------------------------------------------|----------------------------------|
| Treatment duration, median (range), months                      | 3.5 (0.1–46.7)                   |
| At least 1 TEAE, n (%)                                          | 287 (100)                        |
| At least 1 TEAE grade $\geq 3$ , n (%)                          | 186 (64.8)                       |
| At least 1 serious TEAE, n (%)                                  | 92 (32.1)                        |
| Treatment interruption and/or dose reduction due to TEAE, n (%) | 186 (64.8)                       |
| Treatment interruption due to TEAE                              | 172 (59.9)                       |
| Dose reduction due to TEAE                                      | 134 (46.7)                       |
| Discontinued due to a TEAE, n (%)                               | 69 (24.0)                        |
| Death due to a TEAE, n (%)                                      | 18 (6.3)                         |
| Malignant neoplasm progression                                  | 10 (3.5)                         |
| Nonprogression AE leading to death                              | 8 (2.8)                          |
| AE, adverse event; TEAE, treatment-emergent adverse event.      |                                  |



**Supplementary Table S4 | Most common (≥10% of patients) TEAEs of any grade in ARIEL2 Part 2**

| TEAE                                                                                                                                    | ARIEL2 Part 2<br>(N=287) |                    |
|-----------------------------------------------------------------------------------------------------------------------------------------|--------------------------|--------------------|
|                                                                                                                                         | Any grade,<br>n (%)      | Grade ≥3,<br>n (%) |
| Nausea                                                                                                                                  | 219 (76.3)               | 16 (5.6)           |
| Asthenia or fatigue                                                                                                                     | 212 (73.9)               | 33 (11.5)          |
| Anemia or decreased hemoglobin                                                                                                          | 127 (44.3)               | 63 (22.0)          |
| Vomiting                                                                                                                                | 126 (43.9)               | 17 (5.9)           |
| Decreased appetite                                                                                                                      | 112 (39.0)               | 11 (3.8)           |
| ALT or AST increased                                                                                                                    | 101 (35.2)               | 26 (9.1)           |
| Abdominal pain                                                                                                                          | 93 (32.4)                | 12 (4.2)           |
| Dysgeusia                                                                                                                               | 93 (32.4)                | 1 (0.3)            |
| Constipation                                                                                                                            | 84 (29.3)                | 5 (1.7)            |
| Diarrhea                                                                                                                                | 84 (29.3)                | 5 (1.7)            |
| Thrombocytopenia or decreased platelets                                                                                                 | 78 (27.2)                | 25 (8.7)           |
| Dyspnea                                                                                                                                 | 68 (23.7)                | 3 (1.0)            |
| Blood creatinine increased                                                                                                              | 65 (22.6)                | 2 (0.7)            |
| Edema peripheral                                                                                                                        | 38 (13.2)                | 1 (0.3)            |
| Abdominal pain (upper)                                                                                                                  | 36 (12.5)                | 3 (1.0)            |
| Urinary tract infection                                                                                                                 | 36 (12.5)                | 8 (2.8)            |
| Dizziness                                                                                                                               | 35 (12.2)                | 0                  |
| Headache                                                                                                                                | 35 (12.2)                | 0                  |
| Pyrexia                                                                                                                                 | 34 (11.8)                | 0                  |
| Abdominal distension                                                                                                                    | 32 (11.1)                | 0                  |
| Cough                                                                                                                                   | 30 (10.5)                | 0                  |
| Insomnia                                                                                                                                | 30 (10.5)                | 0                  |
| Neutropenia or decreased ANC                                                                                                            | 30 (10.5)                | 17 (5.9)           |
| Weight decreased                                                                                                                        | 30 (10.5)                | 1 (0.3)            |
| Hypomagnesemia                                                                                                                          | 29 (10.1)                | 2 (0.7)            |
| ALT, alanine aminotransferase; ANC, absolute neutrophil count; AST, aspartate aminotransferase; TEAE, treatment-emergent adverse event. |                          |                    |

**Supplementary Table S5 | MDS/AML incidence on treatment and after treatment discontinuation**

|                                                                                                                                                                                                                                     | MDS/AML incidence, n (%)  |                                 |
|-------------------------------------------------------------------------------------------------------------------------------------------------------------------------------------------------------------------------------------|---------------------------|---------------------------------|
|                                                                                                                                                                                                                                     | On treatment <sup>a</sup> | After treatment discontinuation |
| <b>ARIEL2 Part 1 (n=204)</b>                                                                                                                                                                                                        | <b>0</b>                  | <b>1 (0.5)</b>                  |
| <i>BRCA</i> mutant                                                                                                                                                                                                                  | 0                         | 0                               |
| <i>BRCA</i> wild type/LOH high                                                                                                                                                                                                      | 0                         | 1 (0.5)                         |
| <b>ARIEL2 Part 2 (n=287)</b>                                                                                                                                                                                                        | <b>2 (0.7)</b>            | <b>3 (1.0)</b>                  |
| <i>BRCA</i> mutant                                                                                                                                                                                                                  | 1 (0.3)                   | 2 (0.7)                         |
| <i>BRCA</i> wild type/LOH high                                                                                                                                                                                                      | 1 (0.3)                   | 1 (0.3)                         |
| <sup>a</sup> Occurring while on rucaparib treatment or during the 28-day safety follow-up.<br>AML, acute myeloid leukemia; <i>BRCA</i> , <i>BRCA1</i> or <i>BRCA2</i> ; LOH, loss of heterozygosity; MDS, myelodysplastic syndrome. |                           |                                 |

**Supplementary Table S6 | ORR by molecular subgroups and prior lines of therapy, and platinum status**

|                          | % (n/N) [95% CI]                |                                |                                 |                                              |                                |                              |                                |                             |                             |                                                     |                              |                             |                                  |                                 |                                 |
|--------------------------|---------------------------------|--------------------------------|---------------------------------|----------------------------------------------|--------------------------------|------------------------------|--------------------------------|-----------------------------|-----------------------------|-----------------------------------------------------|------------------------------|-----------------------------|----------------------------------|---------------------------------|---------------------------------|
|                          | <i>BRCA</i> mut (n=138)         |                                |                                 | <i>BRCA</i> wt/LOH-high <sup>a</sup> (n=156) |                                |                              | <i>BRCA</i> wt/LOH-low (n=168) |                             |                             | <i>BRCA</i> wt/LOH unclassified <sup>b</sup> (n=29) |                              |                             | Overall (n=491)                  |                                 |                                 |
|                          | Prior Chemotherapy Regimens     |                                |                                 |                                              |                                |                              |                                |                             |                             |                                                     |                              |                             |                                  |                                 |                                 |
|                          | All                             | 1-2                            | ≥3                              | All                                          | 1-2                            | ≥3                           | All                            | 1-2                         | ≥3                          | All                                                 | 1-2                          | ≥3                          | All                              | 1-2                             | ≥3                              |
| <b>Platinum Status</b>   |                                 |                                |                                 |                                              |                                |                              |                                |                             |                             |                                                     |                              |                             |                                  |                                 |                                 |
| <b>Sensitive (n=283)</b> | 64.9<br>(48/74)<br>[52.9-75.6]  | 87.1<br>(27/31)<br>[70.2-96.4] | 48.8<br>(21/43)<br>[33.3-64.5]  | 27.7<br>(23/83)<br>[18.4-38.6]               | 35.7<br>(20/56)<br>[23.4-49.6] | 11.1<br>(3/27)<br>[2.4-29.2] | 8.9<br>(10/112)<br>[4.4-15.8]  | 9.6<br>(7/73)<br>[3.9-18.8] | 7.7<br>(3/39)<br>[1.6-20.9] | 28.6<br>(4/14)<br>[8.4-58.1]                        | 30.0<br>(3/10)<br>[6.7-65.2] | 25.0<br>(1/4)<br>[0.6-80.6] | 30.0<br>(85/283)<br>[24.8-35.7]  | 33.5<br>(57/170)<br>[26.5-41.2] | 24.8<br>(28/113)<br>[17.1-33.8] |
| <b>Resistant (n=160)</b> | 30.0<br>(15/50)<br>[17.9-44.6]  |                                | 30.0<br>(15/50)<br>[17.9-44.6]  | 5.5<br>(3/55)<br>[1.1-15.1]                  | 0<br>(0/1)<br>[NA, NA]         | 5.6<br>(3/54)<br>[1.2-15.4]  | 4.7<br>(2/43)<br>[0.6-15.8]    | 0<br>(0/1)<br>[NA, NA]      | 4.8<br>(2/42)<br>[0.6-16.2] | 0<br>(0/12)<br>[0.0-26.5]                           | 0<br>(0/1)<br>[NA, NA]       | 0<br>(0/11)<br>[0.0-28.5]   | 12.5<br>(20/160)<br>[7.8-18.6]   | 0<br>(0/3)<br>[0.0-70.8]        | 12.7<br>(20/157)<br>[8.0-19.0]  |
| <b>Refractory (n=48)</b> | 0<br>(0/14)<br>[0.0-23.2]       |                                | 0<br>(0/14)<br>[0.0-23.2]       | 0<br>(0/18)<br>[0.0-18.5]                    |                                | 0<br>(0/18)<br>[0.0-18.5]    | 7.7<br>(1/13)<br>[0.2-36.0]    |                             | 7.7<br>(1/13)<br>[0.2-36.0] | 0<br>(0/3)<br>[0.0-70.8]                            |                              | 0<br>(0/3)<br>[0.0-70.8]    | 2.1<br>(1/48)<br>[0.1-11.1]      |                                 | 2.1<br>(1/48)<br>[0.1-11.1]     |
| <b>Total (n=491)</b>     | 45.7<br>(63/138)<br>[37.2-54.3] | 87.1<br>(27/31)<br>[70.2-96.4] | 33.6<br>(36/107)<br>[24.8-43.4] | 16.7<br>(26/156)<br>[11.2-23.5]              | 35.1<br>(20/57)<br>[22.9-48.9] | 6.1<br>(6/99)<br>[2.3-12.7]  | 7.7<br>(13/168)<br>[4.2-12.9]  | 9.5<br>(7/74)<br>[3.9-18.5] | 6.4<br>(6/94)<br>[2.4-13.4] | 13.8<br>(4/29)<br>[3.9-31.7]                        | 27.3<br>(3/11)<br>[6.0-61.0] | 5.6<br>(1/18)<br>[0.1-27.3] | 21.6<br>(106/491)<br>[18.0-25.5] | 32.9<br>(57/173)<br>[26.0-40.5] | 15.4<br>(49/318)<br>[11.6-19.9] |

Grey cells indicate ORR ≥10%.

<sup>a</sup>For LOH high, a cutoff of ≥16% genomic LOH was used.

<sup>b</sup>HGOC sample was not evaluable for percentage of genomic LOH due to low neoplastic content or low aneuploidy.

BRCA, *BRCA1* or *BRCA2*; CI, confidence interval; HGOC, high-grade ovarian carcinoma; LOH, loss of heterozygosity; mut, mutated; NA, not available; ORR, objective response rate; wt, wild type.

**Supplementary Table S7 | Multivariate logistic regression model for ORR.** A stepwise multivariate logistic regression model was used to identify predictors of confirmed response (partial response or complete response) including the following baseline characteristics (n=491): age, body mass index, race, Eastern Cooperative Oncology Group performance status, type of ovarian cancer, number of prior chemotherapy regimens, platinum status (sensitive, resistant, refractory), and genomic characteristics.

The number of prior chemotherapy regimens ( $P=0.0011$ ), platinum status ( $P=0.0061$ ), and the genomic characteristics ( $P<0.0001$ ) were found to be significant predictors in the model using a two-sided significance level of 0.05. All other baseline characteristics had  $P$  values  $>0.2$  and not included in the model.

| Parameter                                                                                                                                                                                                                                                                                                                                                   | Estimate | Standard error | P value |
|-------------------------------------------------------------------------------------------------------------------------------------------------------------------------------------------------------------------------------------------------------------------------------------------------------------------------------------------------------------|----------|----------------|---------|
| Intercept                                                                                                                                                                                                                                                                                                                                                   | -0.9381  | 0.6118         | 0.1252  |
| Number of prior chemotherapy regimens                                                                                                                                                                                                                                                                                                                       | -0.5210  | 0.1593         | 0.0011  |
| Platinum status                                                                                                                                                                                                                                                                                                                                             |          |                |         |
| Resistant                                                                                                                                                                                                                                                                                                                                                   | 0.1224   | 0.4074         | 0.7638  |
| Sensitive                                                                                                                                                                                                                                                                                                                                                   | 1.1387   | 0.4006         | 0.0045  |
| Genomic characteristics                                                                                                                                                                                                                                                                                                                                     |          |                |         |
| <i>BRCA</i> mutation                                                                                                                                                                                                                                                                                                                                        | 1.7191   | 0.3661         | <0.0001 |
| <i>RAD51C/D</i> mutation                                                                                                                                                                                                                                                                                                                                    | 1.8552   | 1.0391         | 0.0742  |
| Other HRR gene mutation                                                                                                                                                                                                                                                                                                                                     | -1.8893  | 0.9244         | 0.0410  |
| HRRwt – methyl high                                                                                                                                                                                                                                                                                                                                         | 1.1984   | 0.5688         | 0.0351  |
| HRRwt – methyl low                                                                                                                                                                                                                                                                                                                                          | -0.7958  | 0.9717         | 0.4128  |
| HRRwt – methyl NA                                                                                                                                                                                                                                                                                                                                           | -0.9147  | 0.3845         | 0.0173  |
| Reference categories that are an exact linear combinations of the other categories for corresponding predictor is not displayed (eg, platinum status of refractory and genomic characteristics of HRRwt unmethylated).<br>BRCA, <i>BRCA1</i> or <i>BRCA2</i> ; HRR, homologous recombination repair; methyl, methylation; NA, not available; wt, wild type. |          |                |         |

**Supplementary Table S8 | Odds ratio estimates for the significant predictors of response.**

Consistent with the findings of the univariate analyses of these subgroups, the multivariate logistrics regression model identified known prognostics factors such as number of prior chemotherapy regimens and platinum status, as well as HRR gene and methylation as significant predictors for confirmed response in the patient population (n=491).

| <b>Effect</b>                                                                                                                                              | <b>Odds ratio</b> | <b>95% CI</b> |
|------------------------------------------------------------------------------------------------------------------------------------------------------------|-------------------|---------------|
| Number of prior chemotherapy regimens                                                                                                                      | 0.594             | 0.435–0.812   |
| Platinum status                                                                                                                                            |                   |               |
| Resistant vs Refractory                                                                                                                                    | 3.989             | 0.477–33.391  |
| Sensitive vs Refractory                                                                                                                                    | 11.022            | 1.337–90.888  |
| Genomic characteristics                                                                                                                                    |                   |               |
| <i>BRCA</i> mutation vs HRRwt unmethylated                                                                                                                 | 18.030            | 7.575–42.917  |
| <i>RAD51C/D</i> mutation vs HRRwt unmethylated                                                                                                             | 20.658            | 1.865–228.889 |
| Other HRR gene mutation vs HRRwt unmethylated                                                                                                              | 0.489             | 0.057–4.152   |
| HRRwt – methyl high vs unmethylated                                                                                                                        | 10.711            | 2.852–40.230  |
| HRRwt – methyl low vs unmethylated                                                                                                                         | 1.458             | 0.153–13.878  |
| HRRwt – methyl NA vs unmethylated                                                                                                                          | 1.295             | 0.541–3.100   |
| BRCA, <i>BRCA1</i> or <i>BRCA2</i> ; CI, confidence interval; HRR, homologous recombination repair; methyl, methylation; NA, not available; wt, wild type. |                   |               |

**Supplementary Table S9 | List of HRR genes defined by protocol**

| <b>BRCA</b>  | <b>non-BRCA HRR</b> |               |
|--------------|---------------------|---------------|
| <i>BRCA1</i> | <i>ATM</i>          | <i>FANCL</i>  |
| <i>BRCA2</i> | <i>ATR</i>          | <i>FANCM</i>  |
|              | <i>ATRX</i>         | <i>MRE11A</i> |
|              | <i>BARD1</i>        | <i>NBN</i>    |
|              | <i>BLM</i>          | <i>PALB2</i>  |
|              | <i>BRIP1</i>        | <i>RAD50</i>  |
|              | <i>CHEK1</i>        | <i>RAD51</i>  |
|              | <i>CHEK2</i>        | <i>RAD51B</i> |
|              | <i>FANCA</i>        | <i>RAD51C</i> |
|              | <i>FANCC</i>        | <i>RAD51D</i> |
|              | <i>FANCD2</i>       | <i>RAD52</i>  |
|              | <i>FANCE</i>        | <i>RAD54L</i> |
|              | <i>FANCF</i>        | <i>RPA1</i>   |
|              | <i>FANCG</i>        |               |
|              | <i>FANCI</i>        |               |

HRR, homologous recombination repair.

**Supplementary Table S10 | Characteristics of patients with non-*BRCA* HRR gene mutations**

| Patient # | Study Part | Gene                       | Protein effect                  | Zygoty                     | Germline/<br>Somatic status                    | Molecular subgroup     | Platinum Status | No. prior chemo. regimens | PFS (mo) | Best response on rucaparib |
|-----------|------------|----------------------------|---------------------------------|----------------------------|------------------------------------------------|------------------------|-----------------|---------------------------|----------|----------------------------|
| 1         | Part 1     | <b>ATM</b>                 | homozygous deletion             | NA                         | Somatic                                        | NA                     | Resistant       | 1                         | 5.1      | SD                         |
| 2         | Part 2     | <b>ATM</b>                 | R1618*                          | heterozygous               | Somatic <sup>a</sup>                           | <i>BRCAwt/LOH-low</i>  | Refractory      | 3                         | 21.2     | SD                         |
| 3         | Part 2     | <b>ATM</b>                 | splice site 4437-1G>T           | NA                         | NA                                             | NA                     | Resistant       | 3                         | 18.2     | SD                         |
| 4         | Part 2     | <b>ATM</b><br><b>CHEK2</b> | R2443*<br>T367fs*15             | homozygous<br>heterozygous | Germline <sup>a</sup><br>Germline <sup>a</sup> | <i>BRCAwt/LOH-low</i>  | Sensitive       | 3                         | 7.0      | SD                         |
| 5         | Part 1     | <b>ATM</b>                 | G2644fs*2                       | homozygous                 | Somatic                                        | <i>BRCAwt/LOH-high</i> | Sensitive       | 1                         | 0.0+     | NE                         |
| 6         | Part 2     | <b>BLM</b>                 | Y736fs*5                        | NA                         | Germline <sup>a</sup>                          | NA                     | Resistant       | 4                         | 3.9      | SD                         |
| 7         | Part 2     | <b>BRIP1</b>               | W1002*                          | homozygous                 | NA                                             | <i>BRCAwt/LOH-high</i> | Resistant       | 4                         | 10.1     | SD                         |
| 8         | Part 2     | <b>BRIP1</b>               | N97fs*3                         | homozygous                 | Germline <sup>a</sup>                          | <i>BRCAwt/LOH-high</i> | Refractory      | 3                         | 2.0      | PD                         |
| 9         | Part 2     | <b>BRIP1</b>               | E458*                           | homozygous                 | Germline <sup>a</sup>                          | <i>BRCAwt/LOH-high</i> | Sensitive       | 3                         | 1.9      | PD                         |
| 10        | Part 1     | <b>BRIP1</b>               | splice site 93+1G>T             | heterozygous               | Germline <sup>a</sup>                          | <i>BRCAwt/LOH-low</i>  | Sensitive       | 1                         | 5.5      | SD                         |
| 11        | Part 1     | <b>BRIP1</b>               | K752fs*12                       | homozygous                 | Germline                                       | <i>BRCAwt/LOH-low</i>  | Sensitive       | 1                         | 2.5+     | SD                         |
| 12        | Part 2     | <b>BRIP1</b>               | R798*                           | homozygous                 | Germline <sup>a</sup>                          | <i>BRCAwt/LOH-low</i>  | Sensitive       | 4                         | 1.2      | PD                         |
| 13        | Part 1     | <b>CHEK2</b>               | splice site<br>1008_1008+1GG>TT | homozygous                 | Somatic                                        | <i>BRCAwt/LOH-low</i>  | Sensitive       | 1                         | 7.2      | SD                         |
| 14        | Part 1     | <b>CHEK2</b>               | Q83fs*27                        | heterozygous               | Germline                                       | <i>BRCAwt/LOH-high</i> | Sensitive       | 3                         | 5.6      | SD                         |
| 15        | Part 2     | <b>CHEK2</b>               | T367fs*15                       | NA                         | Germline <sup>a</sup>                          | <i>BRCAwt/LOH-low</i>  | Sensitive       | 4                         | 5.7      | SD                         |
| 16        | Part 2     | <b>FANCA</b>               | Q1437*                          | homozygous                 | Germline <sup>a</sup>                          | <i>BRCAwt/LOH-low</i>  | Resistant       | 3                         | 0.4      | PD                         |

| Patient # | Study Part | Gene                 | Protein effect       | Zygoty             | Germline/<br>Somatic status | Molecular subgroup      | Platinum Status | No. prior chemo. regimens | PFS (mo) | Best response on rucaparib |
|-----------|------------|----------------------|----------------------|--------------------|-----------------------------|-------------------------|-----------------|---------------------------|----------|----------------------------|
| 17        | Part 2     | <b>FANCI</b>         | L1294fs*10           | NA                 | NA                          | <i>BRC</i> Awt/LOH-high | Resistant       | 3                         | 1.8      | PD                         |
| 18        | Part 1     | <b>FANCI</b>         | I466fs*7             | heterozygous       | Germline                    | <i>BRC</i> Awt/LOH-low  | Sensitive       | 2                         | 1.7      | PD                         |
| 19        | Part 2     | <b>FANCL</b>         | T367fs*12+           | heterozygous       | Germline <sup>a</sup>       | <i>BRC</i> Awt/LOH-low  | Sensitive       | 3                         | 11.1     | SD                         |
| 20        | Part 2     | <b>FANCL</b>         | T367fs*12+           | heterozygous       | Germline <sup>a</sup>       | <i>BRC</i> Awt/LOH-high | Resistant       | 4                         | 1.8      | PD                         |
| 21        | Part 2     | <b>FANCL</b>         | T367fs*12+           | heterozygous       | Germline <sup>a</sup>       | NA                      | Resistant       | 4                         | 0.7      | PD                         |
| 22        | Part 2     | <b>FANCL</b>         | T367fs*12+           | heterozygous       | Germline <sup>a</sup>       | <i>BRC</i> Awt/LOH-high | Resistant       | 4                         | 1.8      | PD                         |
| 23        | Part 2     | <b>FANCM</b>         | K863fs*12            | NA                 | NA                          | <i>BRC</i> Awt/LOH-low  | Sensitive       | 3                         | 3.6      | SD                         |
| 24        | Part 2     | <b>FANCM</b>         | K117*                | homozygous         | NA                          | <i>BRC</i> Awt/LOH-low  | Sensitive       | 3                         | 0.7      | NE                         |
| 25        | Part 1     | <b>NBN</b>           | K233fs*5             | heterozygous       | Germline                    | NA                      | Sensitive       | 1                         | 5.4      | SD                         |
| 26        | Part 1     | <b>NBN</b>           | K219fs*16            | heterozygous       | Germline                    | <i>BRC</i> Awt/LOH-low  | Sensitive       | 1                         | 10.5     | <b>PR</b>                  |
| 27        | Part 1     | <b>RAD51B</b>        | R47*                 | heterozygous       | Germline                    | <i>BRC</i> Awt/LOH-low  | Sensitive       | 2                         | 7.5      | SD                         |
| 28        | Part 1     | <b>RAD51C</b>        | R193*                | homozygous         | Germline                    | <i>BRC</i> Awt/LOH-high | Sensitive       | 1                         | 9.7      | <b>PR</b>                  |
| 29        | Part 1     | <b>RAD51C</b><br>ATR | R370*<br>D1572fs*1   | NA<br>heterozygous | Germline<br>Somatic         | <i>BRC</i> Awt/LOH-high | Sensitive       | 1                         | 51.1+    | <b>PR</b>                  |
| 30        | Part 1     | <b>RAD51C</b>        | splice               | homozygous         | Germline                    | <i>BRC</i> Awt/LOH-high | Sensitive       | 3                         | 8.5      | SD                         |
| 31        | Part 1     | <b>RAD51C</b>        | splice site 572-2A>G | homozygous         | Germline                    | <i>BRC</i> Awt/LOH-high | Sensitive       | 3                         | 8.4      | <b>PR</b>                  |
| 32        | Part 1     | <b>RAD51D</b>        | G146fs*50            | homozygous         | Germline                    | <i>BRC</i> Awt/LOH-high | Sensitive       | 2                         | 11.2     | SD                         |
| 33        | Part 2     | <b>RAD51D</b>        | R120*                | homozygous         | Germline <sup>a</sup>       | <i>BRC</i> Awt/LOH-high | Resistant       | 4                         | 13.0     | <b>PR</b>                  |



| Patient # | Study Part | Gene          | Protein effect        | Zygoty       | Germline/<br>Somatic status | Molecular subgroup      | Platinum Status | No. prior chemo. regimens | PFS (mo) | Best response on rucaparib |
|-----------|------------|---------------|-----------------------|--------------|-----------------------------|-------------------------|-----------------|---------------------------|----------|----------------------------|
| 34        | Part 2     | <b>RAD51D</b> | Q79*                  | homozygous   | Germline <sup>a</sup>       | <i>BRCA</i> wt/LOH-high | Sensitive       | 4                         | 14.7     | PR                         |
| 35        | Part 2     | <b>RAD54L</b> | splice site 1610+1G>A | heterozygous | Somatic <sup>a</sup>        | <i>BRCA</i> wt/LOH-low  | Resistant       | 3                         | 5.5      | SD                         |
| 36        | Part 1     | <b>RAD54L</b> | F591fs*1              | NA           | Somatic                     | <i>BRCA</i> wt/LOH-low  | Sensitive       | 2                         | 7.4      | SD                         |

Bolded gene names indicate primary/driving mutation.  
<sup>a</sup>Germline/somatic status determined using computational inference method.  
+, patient was censored; BRCA, *BRCA1* or *BRCA2*; HRR, homologous recombination repair; LOH, loss of heterozygosity; NA, not available; NE, not evaluable; PD, progressive disease; PFS, progression-free survival; PR, partial response; SD, stable disease; wt, wild type.

**Supplementary Table S11 | Number of cases with high, low, or no (unmethylated) *BRCA1* promoter methylation at screening in evaluated *BRCAMut*, LOH-high, and LOH-low HGOC**

| <b>Molecular subgroup, n (%)</b>                                                                                                                                                                                                                                                                                                        | <b>High<br/><i>BRCA1</i> methylation<br/>(n=16)</b> | <b>Low<br/><i>BRCA1</i> methylation<br/>(n=19)</b> | <b>Unmethylated<br/>(n=193)</b> |
|-----------------------------------------------------------------------------------------------------------------------------------------------------------------------------------------------------------------------------------------------------------------------------------------------------------------------------------------|-----------------------------------------------------|----------------------------------------------------|---------------------------------|
| <i>BRCAMut</i>                                                                                                                                                                                                                                                                                                                          | 0                                                   | 0                                                  | 44 (22.8)                       |
| <i>BRCAwt/LOH-high</i>                                                                                                                                                                                                                                                                                                                  | 13 (81.3)                                           | 17 (89.5)                                          | 62 (32.1)                       |
| <i>BRCAwt/LOH-low</i>                                                                                                                                                                                                                                                                                                                   | 2 (12.5)                                            | 1 (5.3)                                            | 79 (40.9)                       |
| <i>BRCAwt/LOH unknown</i>                                                                                                                                                                                                                                                                                                               | 1 (6.3)                                             | 1 (5.3)                                            | 8 (4.1)                         |
| <p><i>BRCAwt/LOH-high</i> HGOC are significantly enriched for the presence of high and low methylation of the <i>BRCA1</i> promoters (<math>P &lt; 0.0001</math>, Chi-square test).</p> <p><i>BRCA</i>, <i>BRCA1</i> or <i>BRCA2</i>; HGOC, high-grade ovarian carcinoma; LOH, loss of heterozygosity; mut, mutated; wt, wild type.</p> |                                                     |                                                    |                                 |

**Supplementary Table S12 | Retrospective blinded pathologist review of ovarian carcinoma with *KRAS/NRAS/BRAF* mutations**

| Patient # | RAS/BRAF mutation       | TP53 Status | Molecular subgroup      | Platinum status | PFI (months) | Best response | PFS (days) | Local pathology diagnosis |            | Pathology re-review with integrated genomic analysis | Evidence of histology other than HGSC or G2/3 endometrioid |
|-----------|-------------------------|-------------|-------------------------|-----------------|--------------|---------------|------------|---------------------------|------------|------------------------------------------------------|------------------------------------------------------------|
| 1         | KRAS G12V               | wt          | <i>BRCA</i> wt/LOH-low  | Resistant       | 5.6          | PD            | 51         | ENDOMETRIOID              | HIGH GRADE | Mesonephric-like carcinoma                           | Yes                                                        |
| 2         | BRAF V600E              | wt          | <i>BRCA</i> wt/LOH-low  | Refractory      | 0.4          | SD            | 635        | SEROUS                    | HIGH GRADE | LGSC                                                 | Yes                                                        |
| 3         | KRAS G12V               | wt          | Unknown                 | Resistant       | 5.5          | SD            | 547        | ENDOMETRIOID              | HIGH GRADE | NA                                                   | NA                                                         |
| 4         | NRAS Q61R               | wt          | <i>BRCA</i> wt/LOH-low  | Sensitive       | 9.2          | SD            | 166        | SEROUS                    | HIGH GRADE | LGSC                                                 | Yes                                                        |
| 5         | KRAS G12D               | wt          | <i>BRCA</i> wt/LOH-low  | Sensitive       | 12.1         | SD            | 226        | SEROUS                    | HIGH GRADE | High-grade carcinoma with serous features            | No                                                         |
| 6         | NRAS Q61R               | wt          | <i>BRCA</i> wt/LOH-low  | Sensitive       | 50.8         | SD            | 142        | SEROUS                    | HIGH GRADE | LGSC                                                 | Yes                                                        |
| 7         | BRAF G469A <sup>a</sup> | wt          | <i>BRCA</i> wt/LOH-high | Resistant       | 5.8          | PD            | 72         | ENDOMETRIOID              | HIGH GRADE | G2 endometrioid adenocarcinoma                       | No                                                         |
| 8         | KRAS G12V               | wt          | Unknown                 | Resistant       | 5.8          | SD            | 109        | SEROUS                    | HIGH GRADE | LGSC                                                 | Yes                                                        |
| 9         | KRAS G12D               | wt          | <i>BRCA</i> wt/LOH-low  | Resistant       | 2.2          | SD            | 229        | ENDOMETRIOID              | HIGH GRADE | Mesonephric-like carcinoma                           | Yes                                                        |
| 10        | KRAS G12D               | wt          | <i>BRCA</i> wt/LOH-low  | Sensitive       | 9.4          | SD            | 211        | MIXED                     | HIGH GRADE | G1 endometrioid adenocarcinoma                       | Yes                                                        |
| 11        | KRAS G12D               | wt          | <i>BRCA</i> wt/LOH-low  | Resistant       | 2.8          | SD            | 277        | ENDOMETRIOID              | HIGH GRADE | Mesonephric-like carcinoma                           | Yes                                                        |
| 12        | KRAS Q61H, BRAF G466V   | wt          | <i>BRCA</i> wt/LOH-low  | Sensitive       | 71.5         | SD            | 57         | ENDOMETRIOID              | HIGH GRADE | G1 endometrioid adenocarcinoma                       | Yes                                                        |
| 13        | KRAS G12D               | wt          | <i>BRCA</i> wt/LOH-low  | Sensitive       | 58.9         | SD            | 86         | SEROUS                    | HIGH GRADE | LGSC                                                 | Yes                                                        |
| 14        | KRAS G12V               | wt          | <i>BRCA</i> wt/LOH-low  | Resistant       | 0.5          | PD            | 55         | SEROUS                    | HIGH GRADE | LGSC                                                 | Yes                                                        |
| 15        | KRAS G12V               | LoF         | <i>BRCA</i> wt/LOH-high | Sensitive       | 6.3          | PD            | 75         | SEROUS                    | HIGH GRADE | HGSC                                                 | No                                                         |
| 16        | KRAS G12D               | LoF         | <i>BRCA</i> wt/LOH-low  | Sensitive       | 17.5         | SD            | 74         | SEROUS                    | HIGH GRADE | HGSC                                                 | No                                                         |
| 17        | NRAS Q61R               | LoF         | <i>BRCA</i> wt/LOH-high | Sensitive       | 6            | SD            | 112        | ENDOMETRIOID              | HIGH GRADE | HGSC                                                 | No                                                         |
| 18        | KRAS G12V               | LoF         | <i>BRCA</i> mut         | Sensitive       | 16.7         | PR            | 515        | SEROUS                    | HIGH GRADE | HGSC                                                 | No                                                         |
| 19        | KRAS Q61H               | LoF         | <i>BRCA</i> wt/LOH-low  | Sensitive       | 10.9         | PD            | 57         | SEROUS                    | HIGH GRADE | HGSC                                                 | No                                                         |
| 20        | KRAS G12V               | LoF         | <i>BRCA</i> wt/LOH-low  | Sensitive       | 49.7         | PD            | 36         | SEROUS                    | HIGH GRADE | HGSC                                                 | No                                                         |
| 21        | KRAS G12D               | LoF         | <i>BRCA</i> wt/LOH-low  | Resistant       | 4.9          | SD            | 55         | SEROUS                    | HIGH GRADE | HGSC                                                 | No                                                         |

Local pathology reports were used for determining patient eligibility for study enrollment.

<sup>a</sup>Mutation not detected in archival tissue.

*BRCA*, *BRCA1* or *BRCA2*; G1, 2, 3, grade 1, 2, 3; HGSC, high-grade serous carcinoma; LGSC, low-grade serous carcinoma; LoF, loss of function; LOH, loss of heterozygosity; mut, mutant; NA, not available; PFI, platinum-free interval; PFS, progression-free survival; PD, progressive disease; PR, partial response; SD, stable disease; wt, wild type.

**Supplementary Table S13 | Primer Sequences for Methylation Analysis**

| Assay    | Target                     | Sense                                 | Antisense                              | Probe                    | Label |
|----------|----------------------------|---------------------------------------|----------------------------------------|--------------------------|-------|
| MSP      | Methylated <i>BRCA1</i>    | 5'-TCGTGGTAACGGAAAAGCGC-3'            | 5'-AAATCTCAACGAACTCACGCCG-3'           | NA                       | NA    |
| MSP      | Unmethylated <i>BRCA1</i>  | 5'-TTGGTTTTGTGGTAATGGAAAAGTGT-3'      | 5'-CAAAAAATCTCAACAACTCACACCA-3'        | NA                       | NA    |
| MSP      | Methylated <i>RAD51C</i>   | 5'-TGTAAGGTTTCGGAGTTTCGTGC-3'         | 5'-TCGCTAAAACGTACGACGTAACG-3'          | NA                       | NA    |
| MSP      | Unmethylated <i>RAD51C</i> | 5'-GTGTAAAGTTGTAAGTTTGGAGTTTTGTGTG-3' | 5'-CACACACCCTCACTAAAACATACAACATAACA-3' | NA                       | NA    |
| MS-ddPCR | Methylated <i>BRCA1</i>    | 5'-GCGggaattaTagataaataaaaTtg-3'      | 5'-tAtccccCGtccaAAaaAtctca-3'          | 5'-ActcacgccgcaA-3'      | 6-FAM |
| MS-ddPCR | Unmethylated <i>BRCA1</i>  | 5'-GCGggaattaTagataaataaaaTtg-3'      | 5'-tAtccccCGtccaAAaaAtctca-3'          | 5'-ActcaCacCACaAcaAtc-3' | VIC   |

MS-ddPCR, methylation-sensitive digital droplet polymerase chain reaction; MS-PCR, methylation-specific polymerase chain reaction; NA, not applicable.

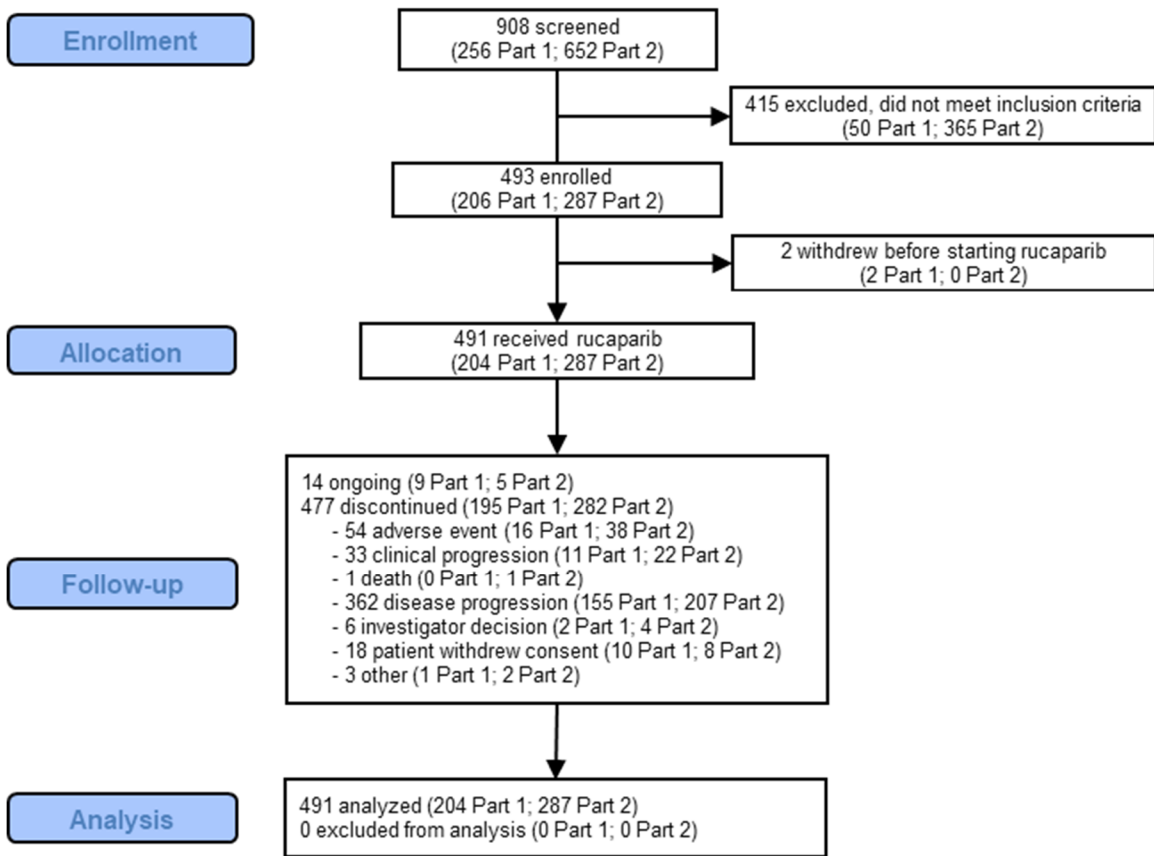

Supplementary Fig. S1 | CONSORT diagram of patient enrollment.

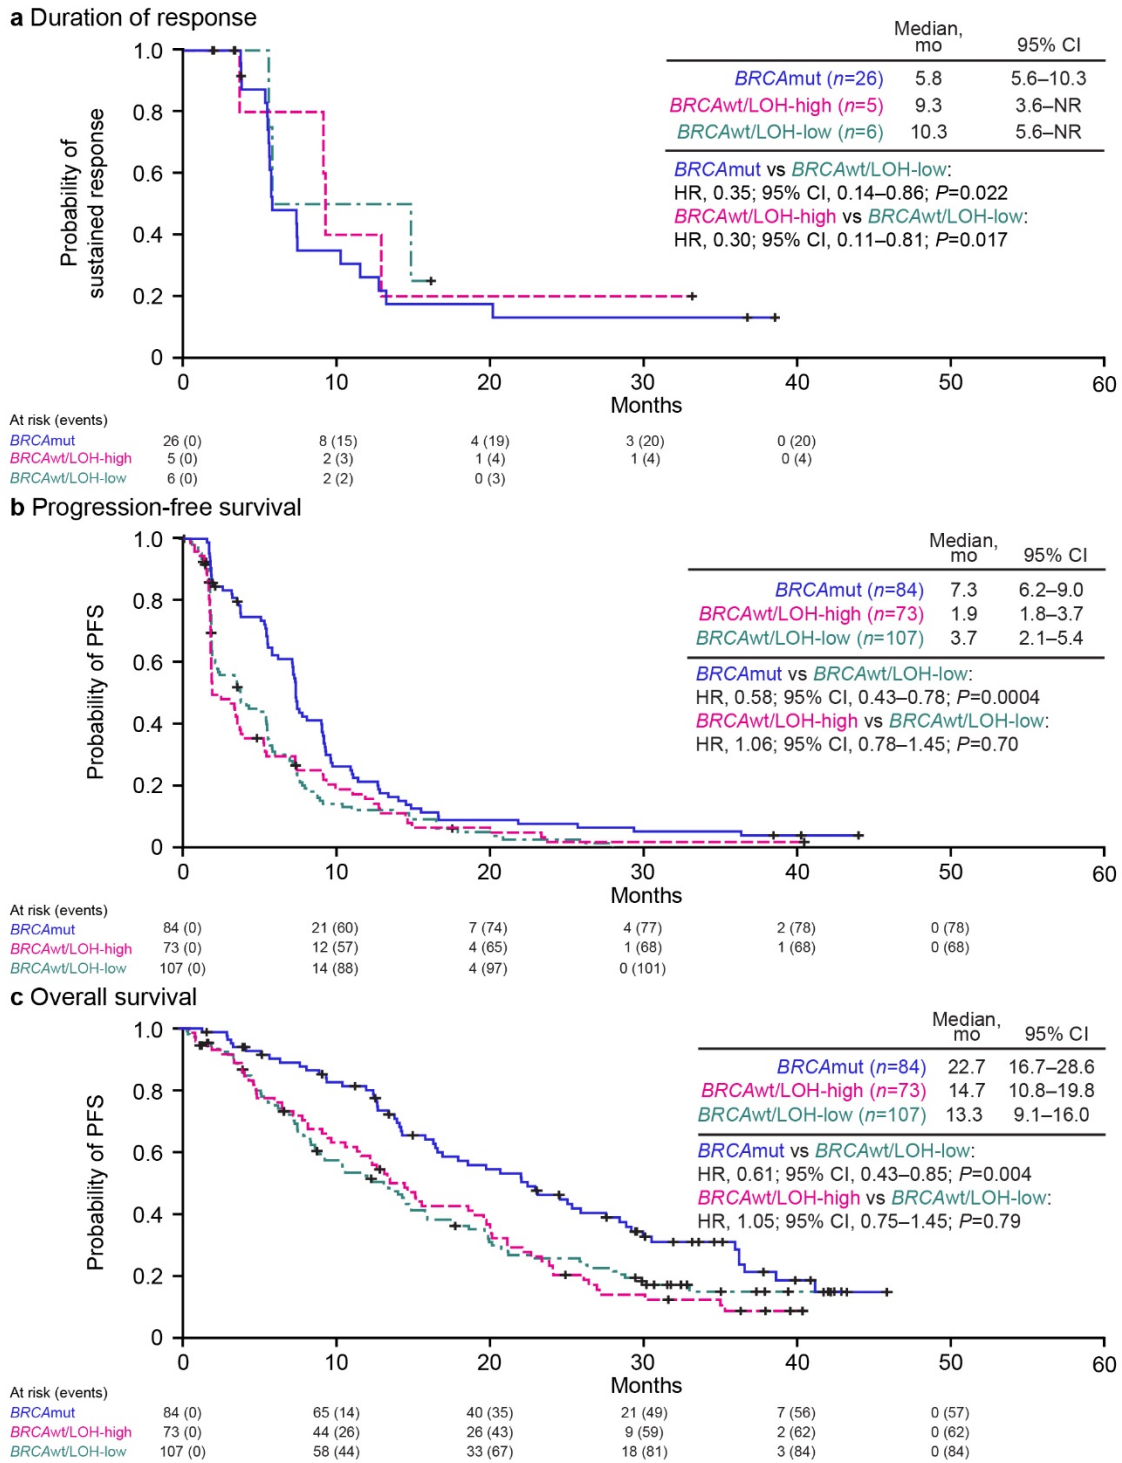

**Supplementary Fig. S2 | (a) Duration of response, and (b, c) secondary endpoints by prespecified HRD subgroup in ARIEL2 Part 2. A prespecified cutoff of 18% was used for LOH; *P* values were computed using a Cox proportional hazard model. BRCA, *BRCA1* or *BRCA2*; CI,**

confidence interval; HR, hazard ratio; HRD, homologous recombination deficiency; LOH, loss of heterozygosity; mut, mutated; wt, wild-type.

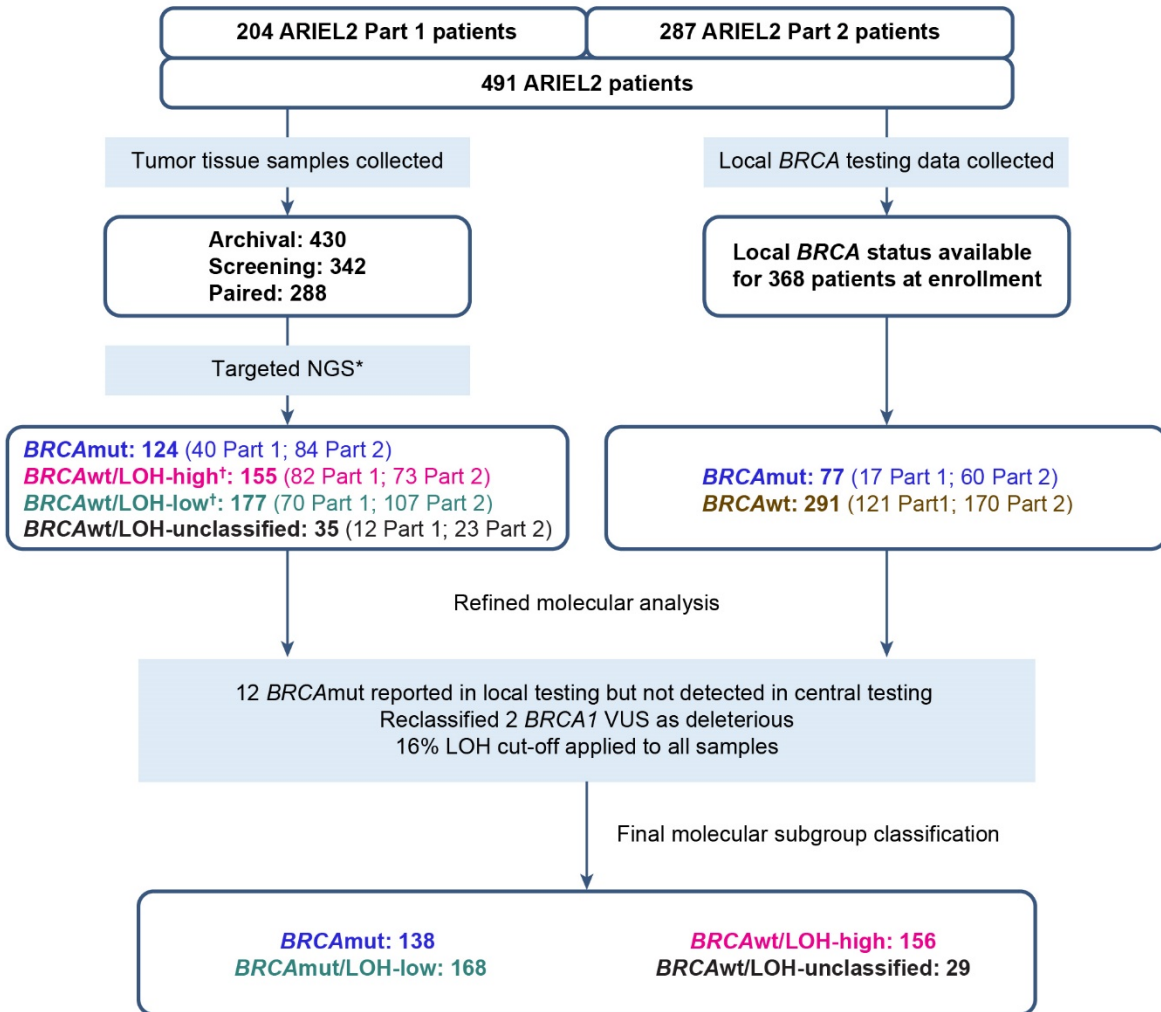

**Supplementary Fig. S3 | Samples collection for molecular analyses from patients in ARIEL2**

**Parts 1 and 2.** \*Targeted NGS data only was used for all pre-specified analyses. †LOH was assigned based on screening sample when available; prespecified LOH cut-offs of 14% for ARIEL2 Part 1 and 18% for ARIEL2 Part 2 were used for all prespecified end-point analyses. BRCA, *BRCA1* or *BRCA2*; LOH, loss of heterozygosity; mut, mutated; NGS, next generation sequencing; VUS, variants of unknown significance; wt, wild-type.



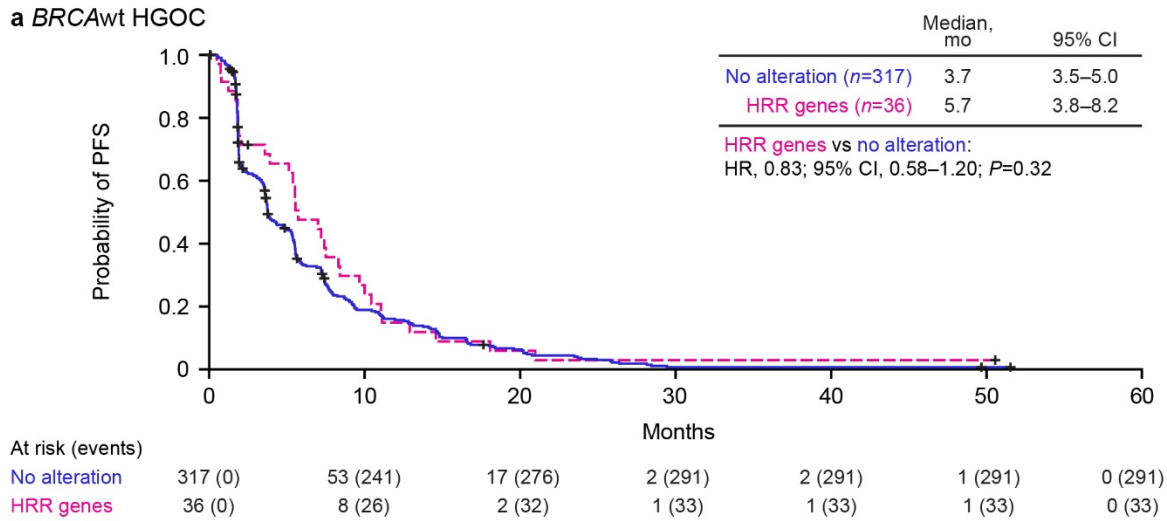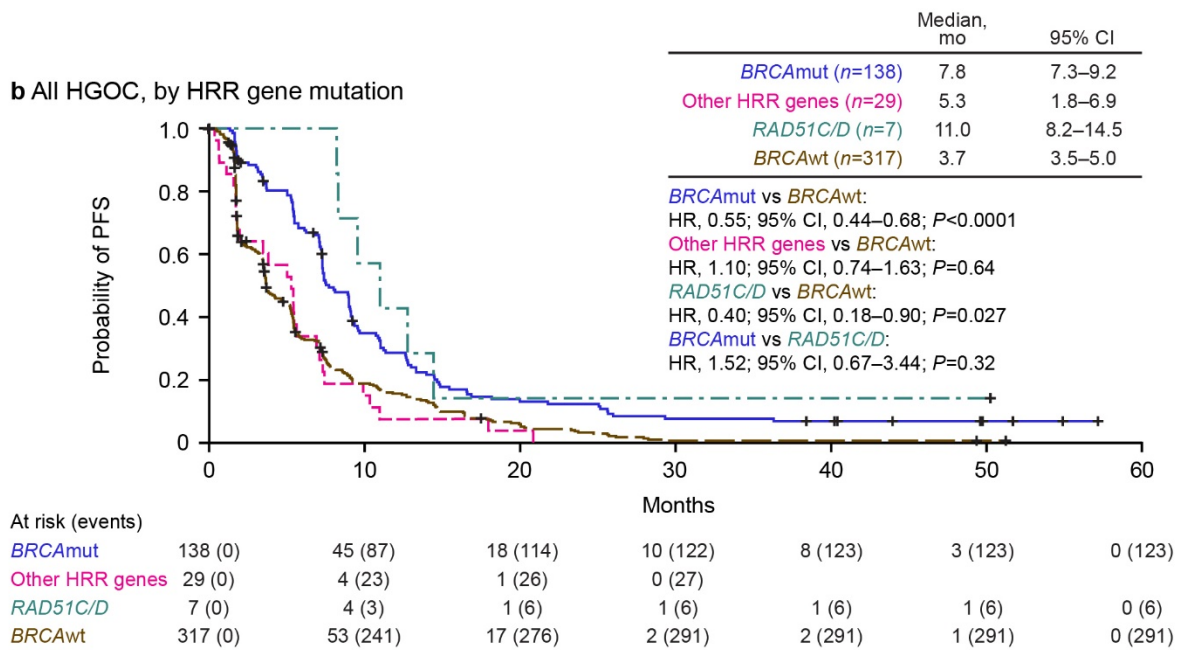

**Supplementary Fig. S4 | PFS by HRR gene mutation. (a)** PFS for patients with *BRCAwt* HGOC with (magenta) or without (blue) mutations in other HRR genes. **(b)** PFS in patients with HGOC with *BRCA* mutation (blue), *BRCAwt* HGOC with *RAD51C/D* mutation (green), *BRCAwt* HGOC with other HRR-gene mutation (magenta), and *BRCAwt* HGOC without any HRR-gene mutations (brown). *P* values were computed using a Cox proportional hazard model. *BRCA*, *BRCA1* or

*BRCA2*; CI, confidence interval; HGOC, high-grade ovarian carcinoma; HR, hazard ratio; HRR, homologous recombination repair; mut, mutated; PFS, progression-free survival; wt, wild-type.

**a** *BRCA*wt HGOC, archival biopsy

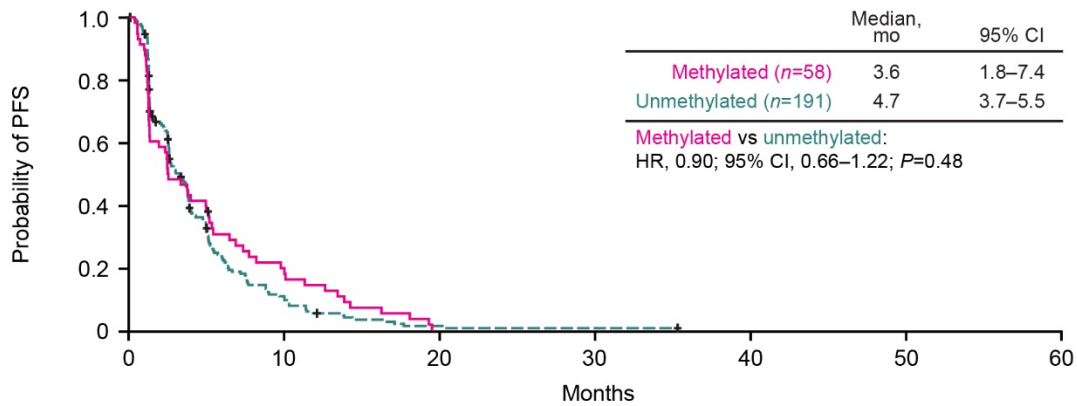

| At risk (events) | 0       | 10       | 20      | 30      | 40      | 50      | 60      |
|------------------|---------|----------|---------|---------|---------|---------|---------|
| Methylated       | 58 (0)  | 15 (42)  | 6 (51)  | 0 (57)  |         |         |         |
| Unmethylated     | 191 (0) | 31 (144) | 8 (166) | 1 (173) | 1 (173) | 1 (173) | 0 (173) |

**b** *BRCA*wt HGOC, screening biopsy

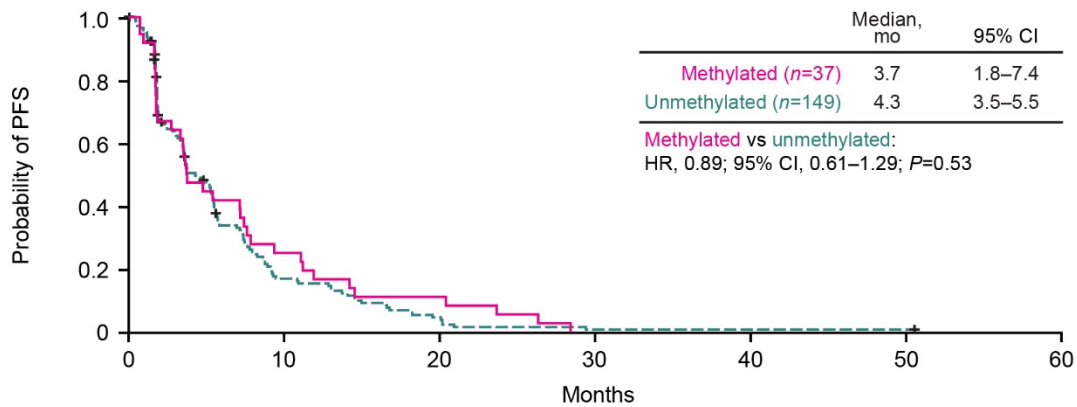

| At risk (events) | 0       | 10       | 20      | 30      | 40      | 50      | 60      |
|------------------|---------|----------|---------|---------|---------|---------|---------|
| Methylated       | 37 (0)  | 9 (27)   | 4 (32)  | 0 (36)  |         |         |         |
| Unmethylated     | 149 (0) | 22 (113) | 6 (129) | 1 (134) | 1 (134) | 1 (134) | 0 (134) |

**Supplementary Fig. S5 | PFS is similar in HGOC with *BRCA1/RAD51C* promoter methylation as determined by MSP analysis (without taking into account quantitative nature of methylation) and in those without detectable methylation. (a)** PFS in patients with *BRCA*wt HGOC with (magenta) or without (teal) detectable *BRCA1* or *RAD51C* promoter methylation in archival pre-platinum tissue. **(b)** PFS in patients with *BRCA*wt HGOC with (magenta) or without (teal) detectable *BRCA1* or *RAD51C* promoter methylation in screening post-platinum biopsy. *P* values were computed using a Cox proportional hazard model. *BRCA*, *BRCA1* or *BRCA2*; CI, confidence

interval; HGOC, high-grade ovarian carcinoma; HR, hazard ratio; MSP, methylation-specific polymerase chain reaction; PFS, progression-free survival; wt, wild-type.

**a** HGOC with known *BRCA1* methylation status, archival biopsy

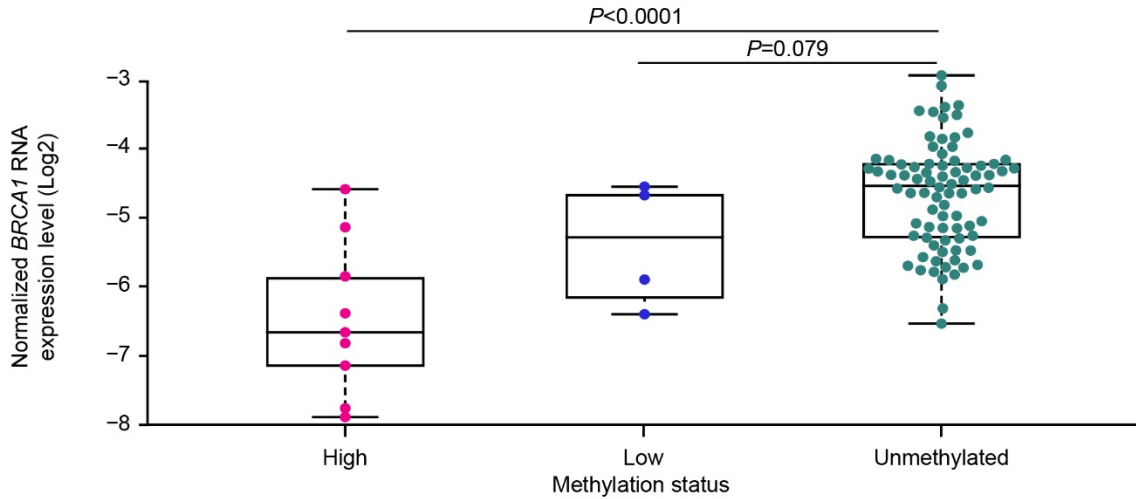

**b** HGOC by mutation or methylation status, screening biopsy

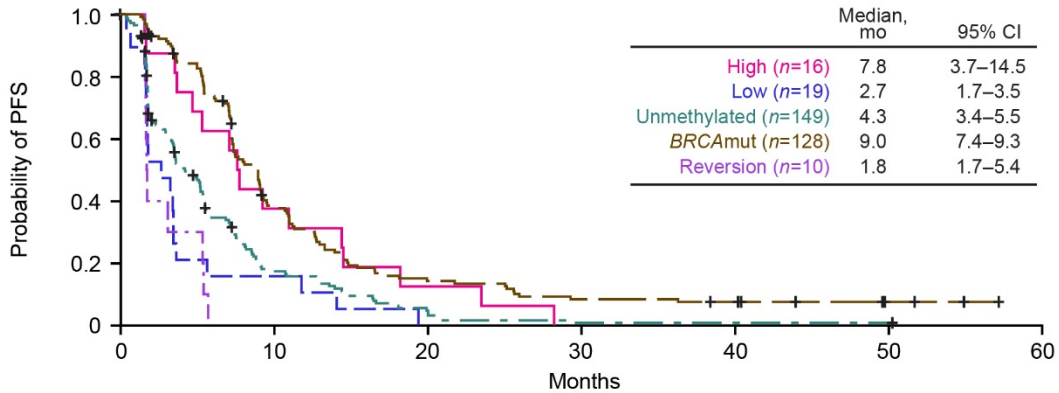

At risk (events)

|              |         |          |          |          |         |         |         |
|--------------|---------|----------|----------|----------|---------|---------|---------|
| High         | 16 (0)  | 6 (10)   | 2 (14)   | 0 (16)   |         |         |         |
| Low          | 19 (0)  | 3 (16)   | 0 (19)   |          |         |         |         |
| Unmethylated | 149 (0) | 22 (112) | 7 (127)  | 1 (133)  | 1 (133) | 1 (133) | 0 (133) |
| BRCAmut      | 128 (0) | 45 (77)  | 18 (104) | 10 (112) | 8 (113) | 3 (113) | 0 (113) |
| Reversion    | 10 (0)  | 0 (10)   |          |          |         |         |         |

| Pairwise comparison  | HR   | 95% CI    | P value | Pairwise comparison       | HR   | 95% CI    | P value |
|----------------------|------|-----------|---------|---------------------------|------|-----------|---------|
| High vs Low          | 0.40 | 0.19–0.80 | 0.01    | BRCAmut vs Low            | 0.32 | 0.20–0.53 | <0.0001 |
| High vs Unmethylated | 0.61 | 0.36–1.04 | 0.067   | Low vs Reversion          | 0.73 | 0.33–1.62 | 0.44    |
| BRCAmut vs High      | 0.84 | 0.50–1.42 | 0.52    | BRCAmut vs Unmethylated   | 0.50 | 0.38–0.64 | <0.0001 |
| High vs Reversion    | 0.20 | 0.07–0.56 | 0.002   | Reversion vs Unmethylated | 0.43 | 0.23–0.84 | 0.013   |
| Low vs Unmethylated  | 1.49 | 0.92–2.42 | 0.10    | BRCAmut vs Reversion      | 0.11 | 0.05–0.23 | <0.0001 |

**Supplementary Fig. S6 | *BRCA1* RNA expression levels and association between methylation**

**levels by quantitative MS-ddPCR and PFS in ARIEL2. (a)** *BRCA1* RNA expression levels in HGOC

with high, low, or no *BRCA1* methylation (unmethylated). Archival tumor specimens were

available for Nanostring assay to determine the *BRCA1* RNA expression level for 95 ARIEL2 patients with known archival *BRCA1* methylation status, determined by MS-ddPCR: 9 high methylation, 4 low methylation, and 82 unmethylated. Boxplots show median, quartiles, minimum, and maximum expression levels within each group. *P* values based on two-sided Wilcoxon rank sum tests. No multiple comparisons adjustment was performed. (b) Association between screening, post-platinum methylation levels determined by quantitative MS-ddPCR and PFS in ARIEL2. Kaplan-Meier plots showing PFS in ARIEL2 patients with HGOC and high (blue), low (red), or no methylation (unmethylated, green), or harboring a *BRCA* mutation (brown) or a *BRCA* reversion mutation (purple) in pretreatment biopsy. *P* values were computed using a Cox proportional hazard model. *BRCA*, *BRCA1* or *BRCA2*; CI, confidence interval; HGOC, high-grade ovarian carcinoma; HR, hazard ratio; MS-ddPCR, methylation-sensitive digital droplet polymerase chain reaction; mut, mutated; PFS, progression-free survival.

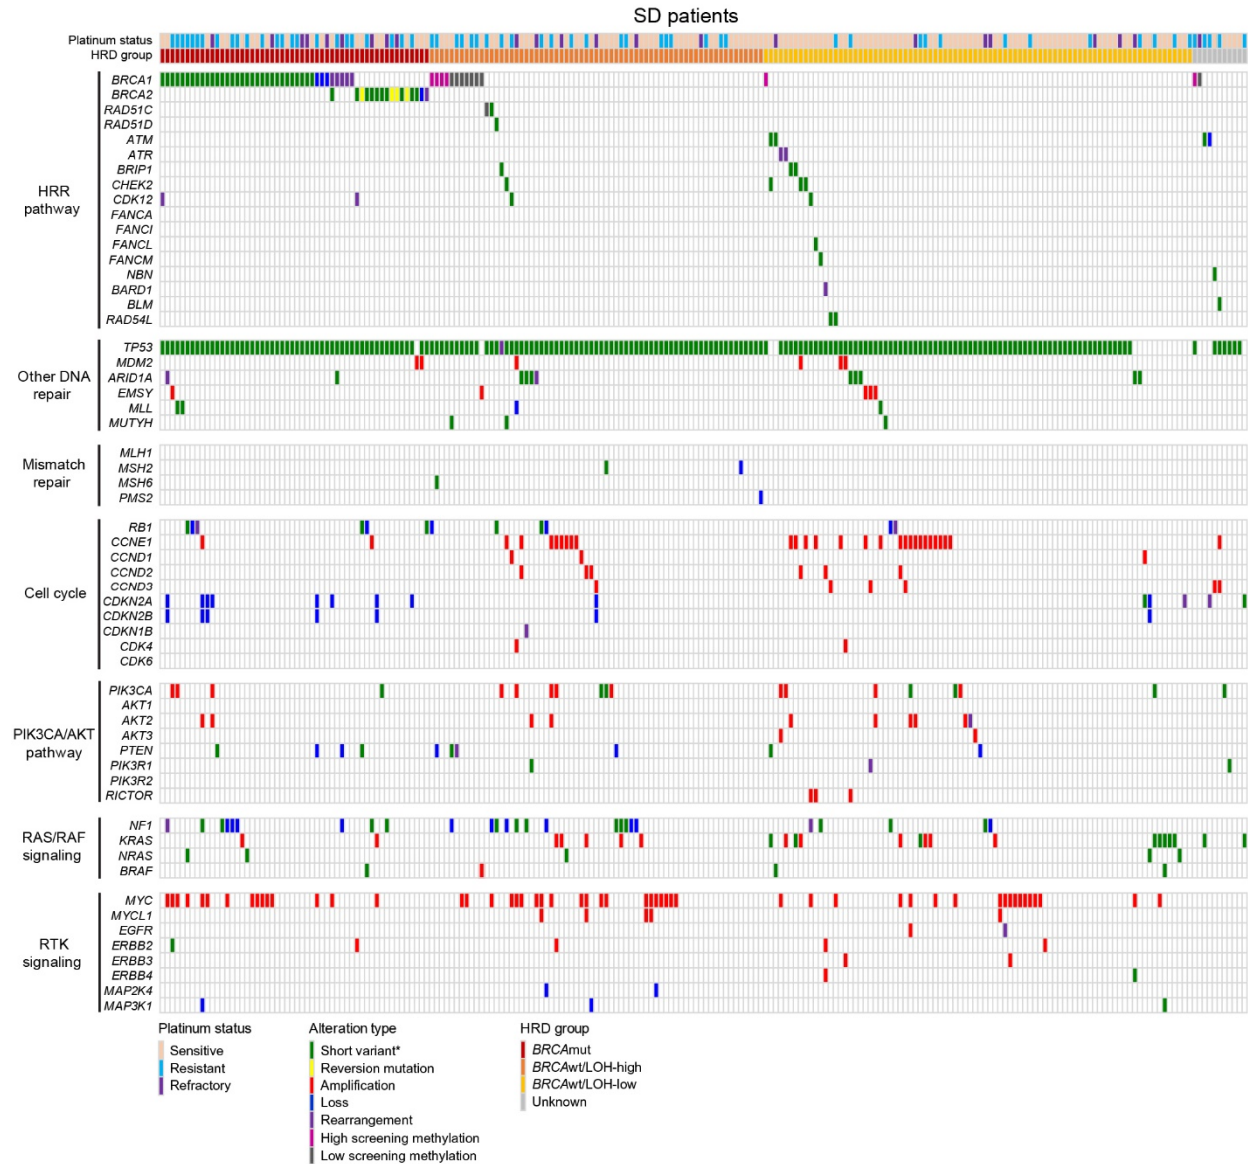

**Supplementary Fig. S7 | Genetic and epigenetic alteration landscape of HGOC from ARIEL2**

**patients with confirmed best response of SD.** Methylation levels shown are at screening.

\*Short variant include nonsense, missense, frameshift and splice site alterations. All reported alterations are deleterious or likely deleterious. HRD, homologous recombination deficiency; HRR, homologous recombination repair; LOH, loss of heterozygosity; mut, mutated; SD, stable disease; wt, wild-type.



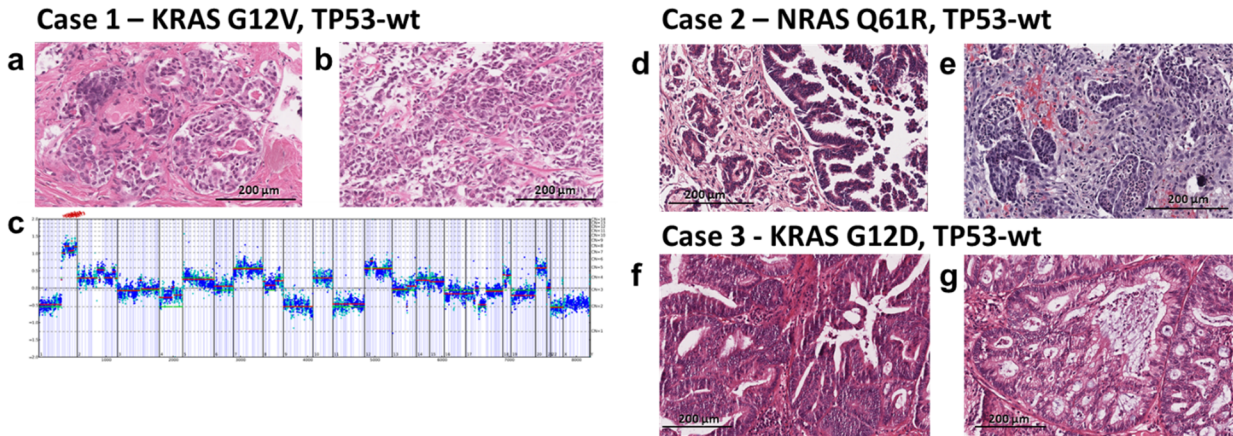

**Supplementary Fig. S8 | Representative cases in which diagnosis was revised for ovarian carcinomas with *KRAS/NRAS/BRAF* activating mutation and no *TP53* alteration (*TP53*-wt).**

Case 1 (Patient #1 in Table S12) was reclassified as mesonephric-like carcinoma based on morphological features characterized by **(a)** tubular and glandular architecture with prominent luminal secretions, **(b)** solid and nested morphology, combined and integrated with tumor genomics harboring *KRAS* G12V, and **(c)** gain of chromosome 1q, 10, and 12 and loss of 1p.

Case 2 (Patient #4 in Table S12) was reclassified as low-grade serous carcinoma based on morphological features of both **(d)** archival and **(e)** screening samples demonstrating papillary architecture and invasive structures with retraction artifact, low-grade nuclear atypia, and low mitotic activity. Case 3 (Patient #10 in Table S12) was revised to low-grade, Grade 1

endometrioid adenocarcinoma based on morphological features, demonstrating cribriform architecture, low-grade nuclear atypia, no solid areas, **(f)** columnar cell morphology, and **(g)** mucinous differentiation. Both archival and screening tissue H&E slides were available for at least two patients each for mesonephric-like carcinomas, low-grade serous carcinomas, and endometrioid adenocarcinomas, and the reclassification was confirmed in both samples.

H&E, hemotoxylin and eosin; wt, wild-type.



**a** *BRC*Awt HGOC, resistant/refractory

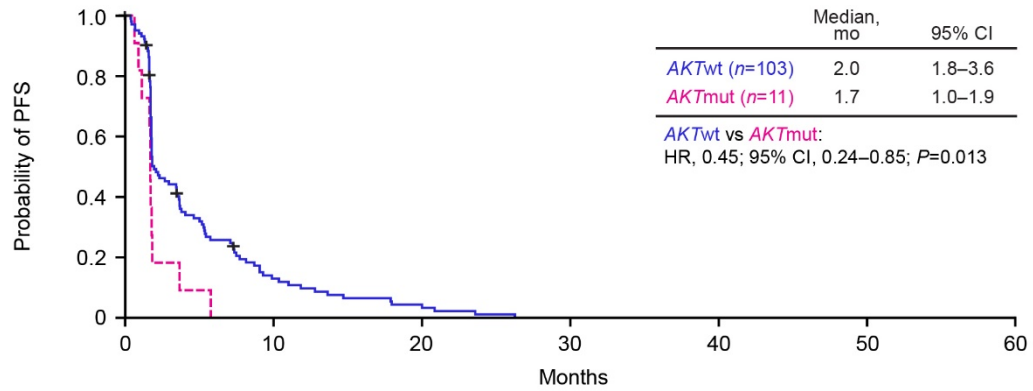

| At risk (events) | 0       | 12      | 24     | 36     |
|------------------|---------|---------|--------|--------|
| <i>AKT</i> wt    | 103 (0) | 12 (86) | 4 (94) | 0 (98) |
| <i>AKT</i> mut   | 11 (0)  | 0 (11)  |        |        |

**b** *BRC*Awt HGOC, resistant/refractory

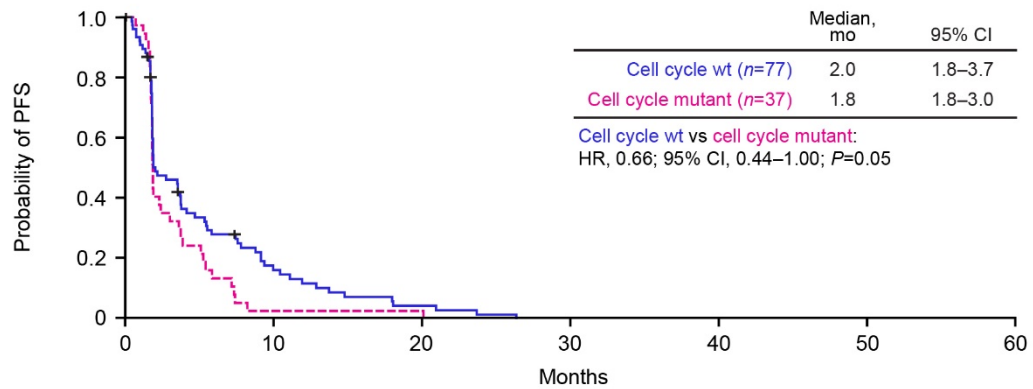

| At risk (events)  | 0      | 12      | 24     | 36     |
|-------------------|--------|---------|--------|--------|
| Cell cycle wt     | 77 (0) | 11 (61) | 3 (69) | 0 (72) |
| Cell cycle mutant | 37 (0) | 1 (36)  | 1 (36) | 0 (37) |

**Supplementary Fig. S9 | Alterations in the *AKT* genes and the cell cycle pathway modulate rucaparib response in platinum-resistant or refractory patients. (a)** Kaplan-Meier plot showing progression-free survival in patients with *BRC*Awt platinum-resistant/refractory HGOC with (magenta) or without (blue) alterations in the *AKT1/2/3* genes in pretreatment biopsies. **(b)** Kaplan-Meier plot showing progression-free survival in ARIEL2 patients with *BRC*Awt platinum-resistant/refractory HGOC (magenta) or without (blue) alterations in cell cycle genes (*CCND1*, *CCND2*, *CCND3*, *CCNE1*, *CDKN1B*, *CDKN2A*, *CDKN2B*, *CDK4*, *CDK6*) in pretreatment biopsies. *P* values were computed using a Cox proportional hazard model. CI, confidence interval; HGOC, high-grade ovarian carcinoma; HR, hazard ratio; mut, mutated; wt, wild-type.

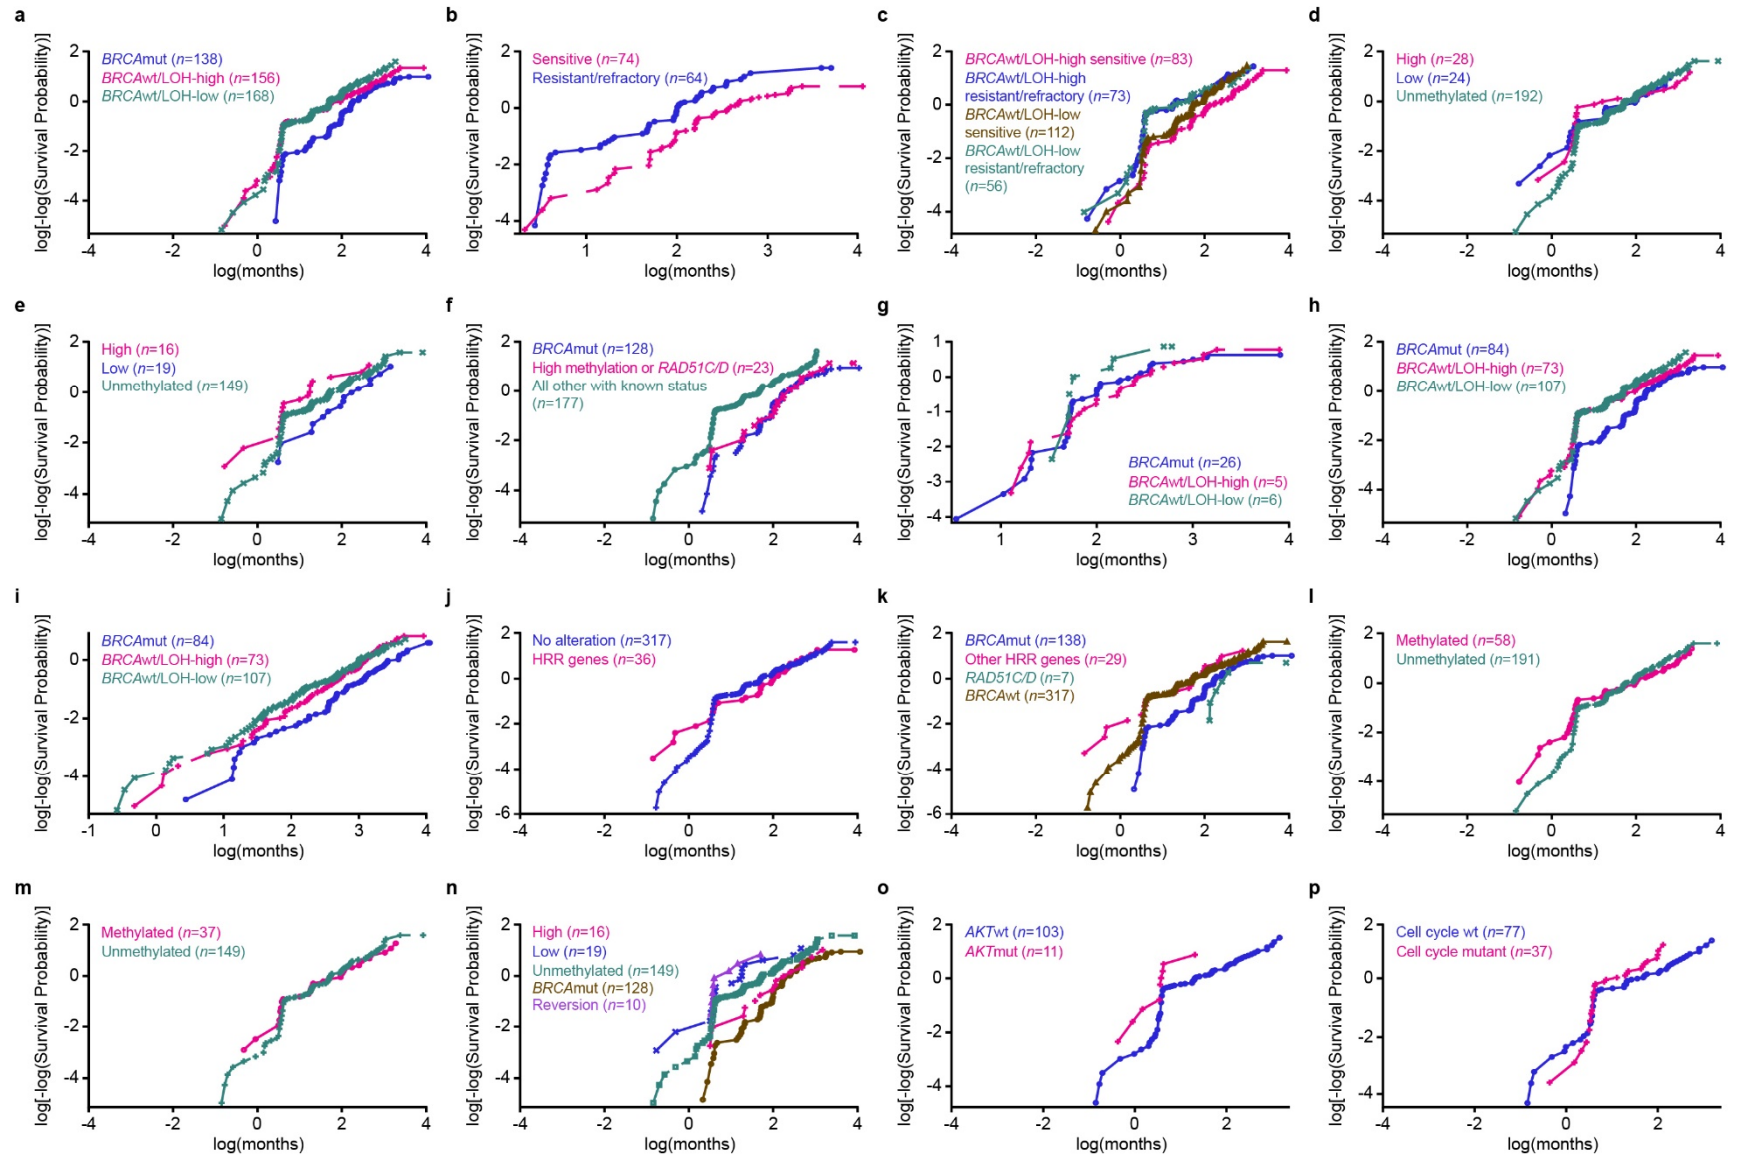

**Supplementary Fig. S10 | Log-log plots used to visually assess the proportional hazards assumption for survival analyses**

**presented in this manuscript. (a)** Log-log plot related to Fig. 1a; **(b)** Log-log plot related for Fig. 1b; **(c)** Log-log plot related to Fig. 1c;

**(d)** Log-log plot related to Fig. 3a; **(e)** Log-log plot related to Fig. 3b; **(f)** Log-log plot related to Fig. 5; **(g)** Log-log plot related to Supplementary Fig. S2a; **(h)** Log-log plot related to Supplementary Fig. S2b; **(i)** Log-log plot related to Supplementary Fig. S2c; **(j)** Log-log plot related to Supplementary Fig. S4a; **(k)** Log-log plot related to Supplementary Fig. S4b; **(l)** Log-log plot related to Supplementary Fig. S5a; **(m)** Log-log plot related to Supplementary Fig. S5b; **(n)** Log-log plot related to Supplementary Fig. S6b; **(o)** Log-log plot related to Supplementary Fig. S9a; **(p)** Log-log plot related to Supplementary Fig. S9b. BRCA, *BRCA1* or *BRCA2*, HRR, homologous recombination repair; LOH, loss of heterozygosity; mut, mutated; wt, wild-type.
